# Supplementary material
Source: PubMed Central journal article supplement (PMC7673636)

**Supplemental material**

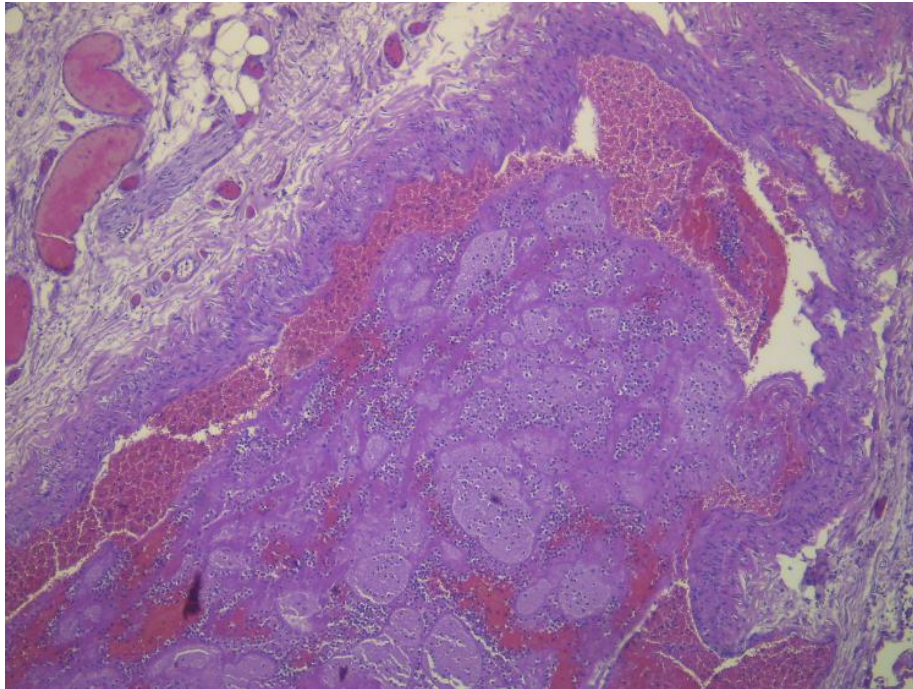

**I: Lung Vessels Thrombosis**

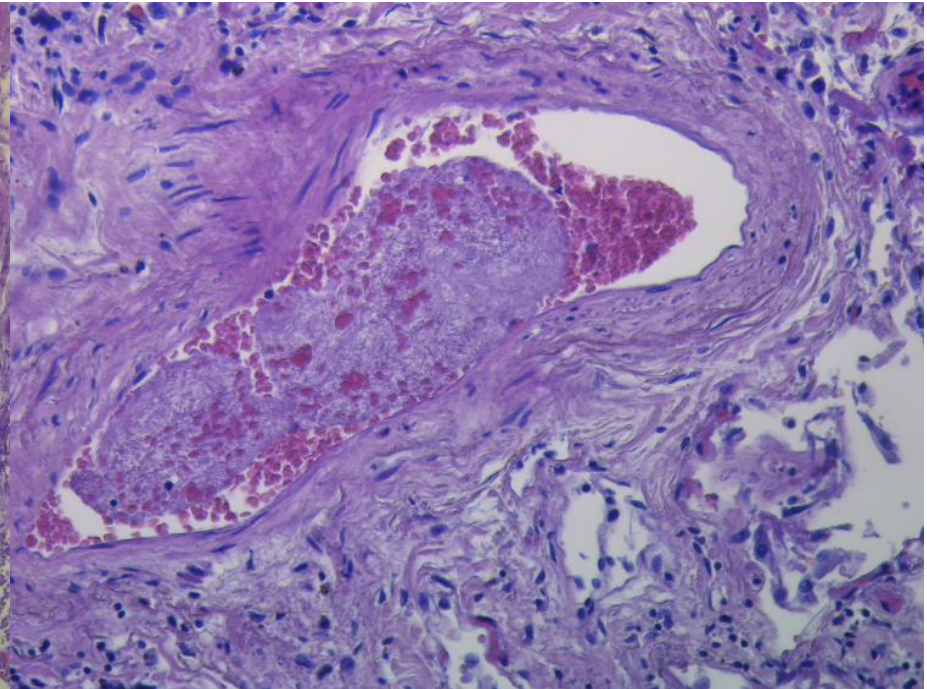

**II: Lung Vessels Thrombosis**

Supplement: hhf-13-e007636-s001.pdf [file hhf-13-e007636-s001.pdf]
